# Supplementary material
Source: PubMed Central journal article supplement (PMC3640357)
Supplement: NIHMS461307-supplement-1_si_001.pdf [file NIHMS461307-supplement-1_si_001.pdf]

Supporting Information (<http://pubs.acs.org>)

$^1\text{H}$ - $^{15}\text{N}$  HSQC spectra of  $^{15}\text{N}$ -labeled A $\beta$ 40WT, which exhibits weak interaction with MBP, produced no appreciable shifts in residue resonances in the presence of unlabeled MBP<sub>1-64</sub>.

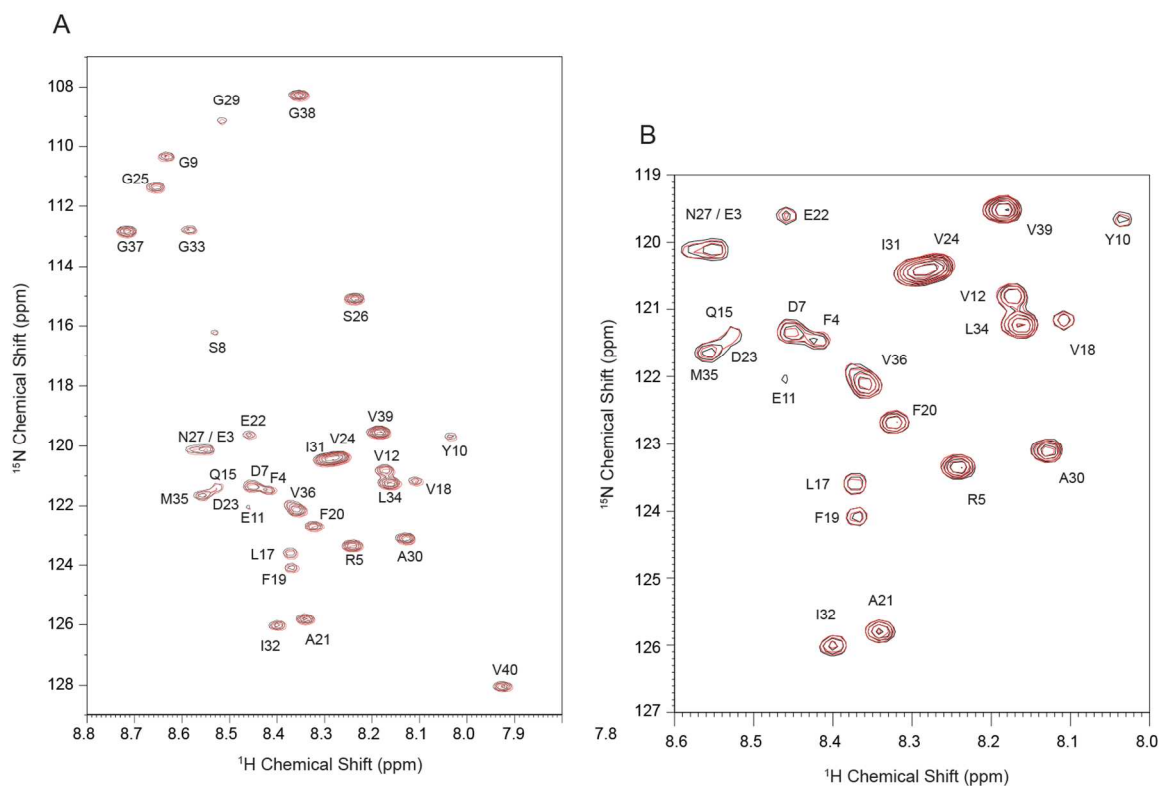

**Figure S1.** A $\beta$ 40WT does not interact with MBP<sub>1-64</sub>.  $^1\text{H}$ - $^{15}\text{N}$  HSQC spectra of  $^{15}\text{N}$ -labeled A $\beta$ 40WT with (red) and without (black) unlabeled MBP<sub>1-64</sub> shows no changes in the resonances of A $\beta$ 40WT upon addition of MBP<sub>1-64</sub>. Panel B is an enlargement of the central portion of the full spectrum shown in panel A. Spectra were obtained in a parallel fashion to those shown for A $\beta$ 42WT and MBP<sub>1-64</sub> in Figure 3.
